# Supplementary material for: Synthesis, structure and properties of [1,2,4]triazolo[4,3-a]pyridin-3-ylidene rhodium and palladium complexes
Source: Royal Society of Chemistry journal article supplement (doi:10.1039/b907043e), 2009-01-01

## **Synthesis, structure and properties of [1,2,4]triazolo[4,3-a]pyridin-3-ylidene Rhodium and Palladium complexes**

**Javier Iglesias-Sigüenza,<sup>a</sup> Abel Ros,<sup>b</sup> Elena Díez,<sup>a</sup> Manuel Alcarazo,<sup>a</sup> Eleuterio Álvarez,<sup>b</sup> Rosario Fernández\*<sup>a</sup> and José M. Lassaletta\*<sup>b</sup>**

<sup>a</sup> *Departamento de Química Orgánica, Facultad de Química, Universidad de Sevilla, Apdo. de Correos No. 553, 41071 Seville, Spain*

<sup>b</sup> *Instituto de Investigaciones Químicas, CSIC-USC, c/ Américo Vespucio 49, Isla de la Cartuja, 41092 Seville, Spain.*

**ELECTRONIC SUPPLEMENTARY INFORMATION (ESI)**

$^1\text{H}$  NMR  $[(\text{CD}_3)_2\text{SO}, 300 \text{ MHz}]$  of **5**

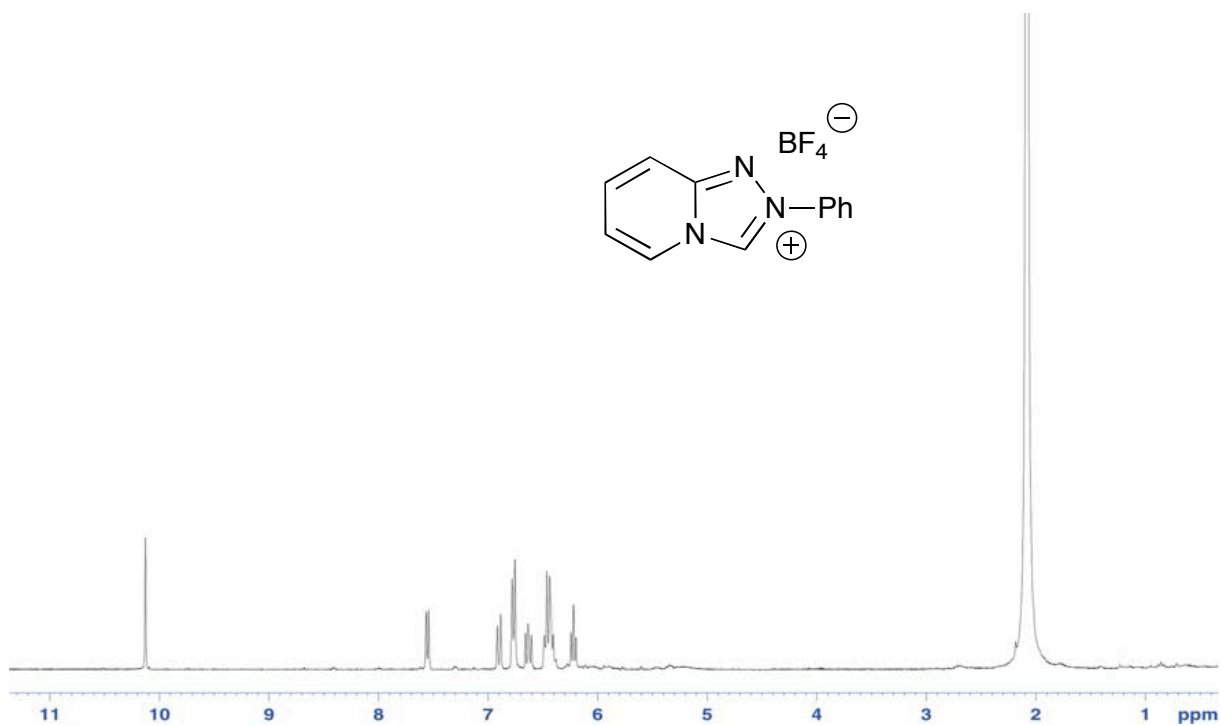

$^{13}\text{C}$  NMR  $[(\text{CD}_3)_2\text{SO}, 75 \text{ MHz}]$  of **5**

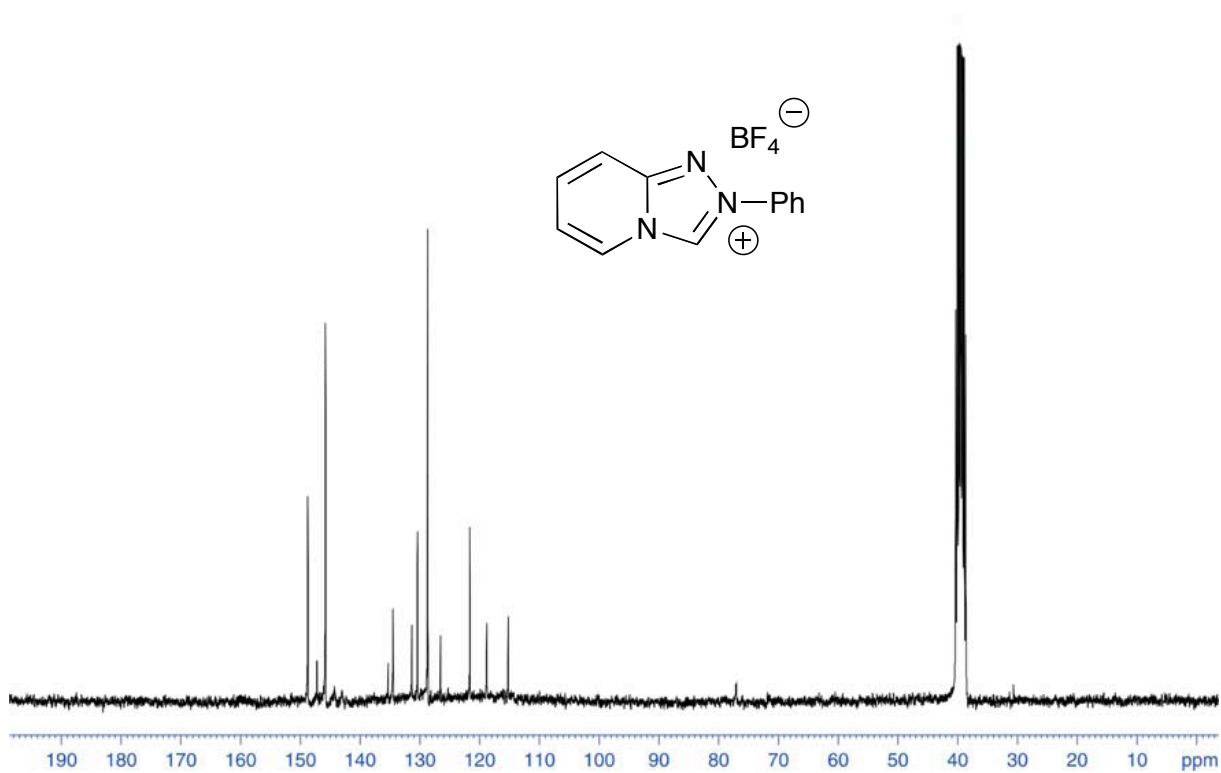

$^1\text{H}$  NMR  $[(\text{CD}_3)_2\text{CO}, 300 \text{ MHz}]$  of **6**

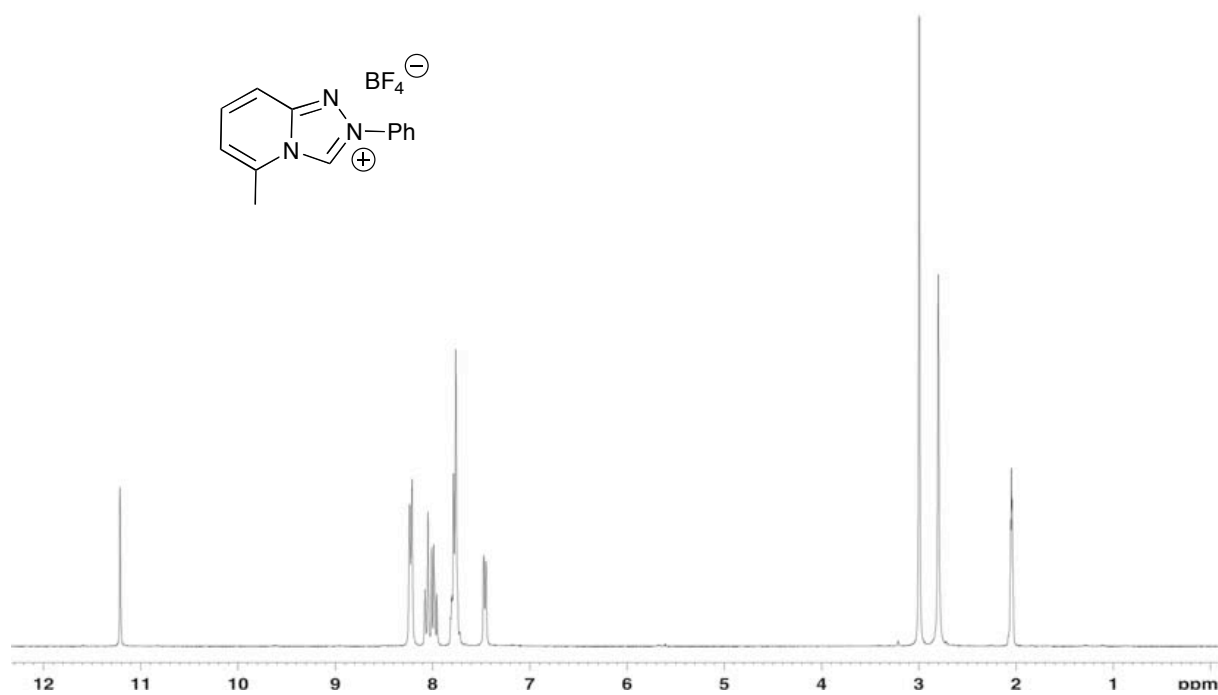

$^{13}\text{C}$  NMR  $[(\text{CD}_3)_2\text{CO}, 75 \text{ MHz}]$  of **6**

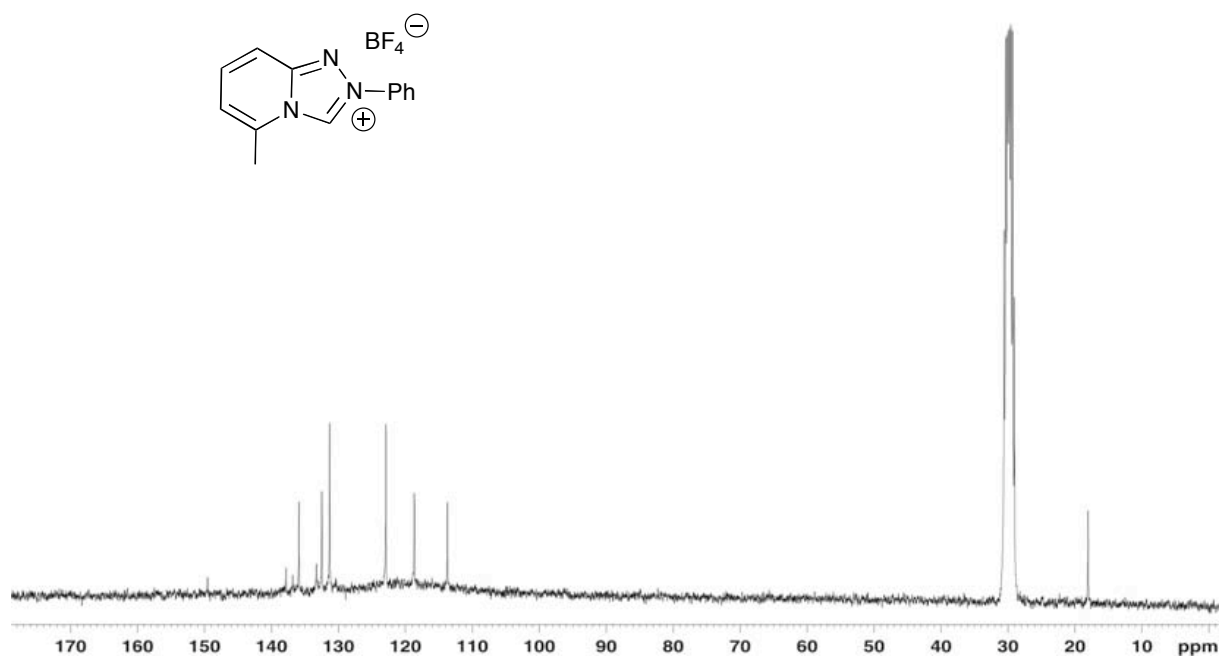

$^1\text{H}$  NMR  $[(\text{CD}_3)_2\text{CO}, 300 \text{ MHz}]$  of **7**

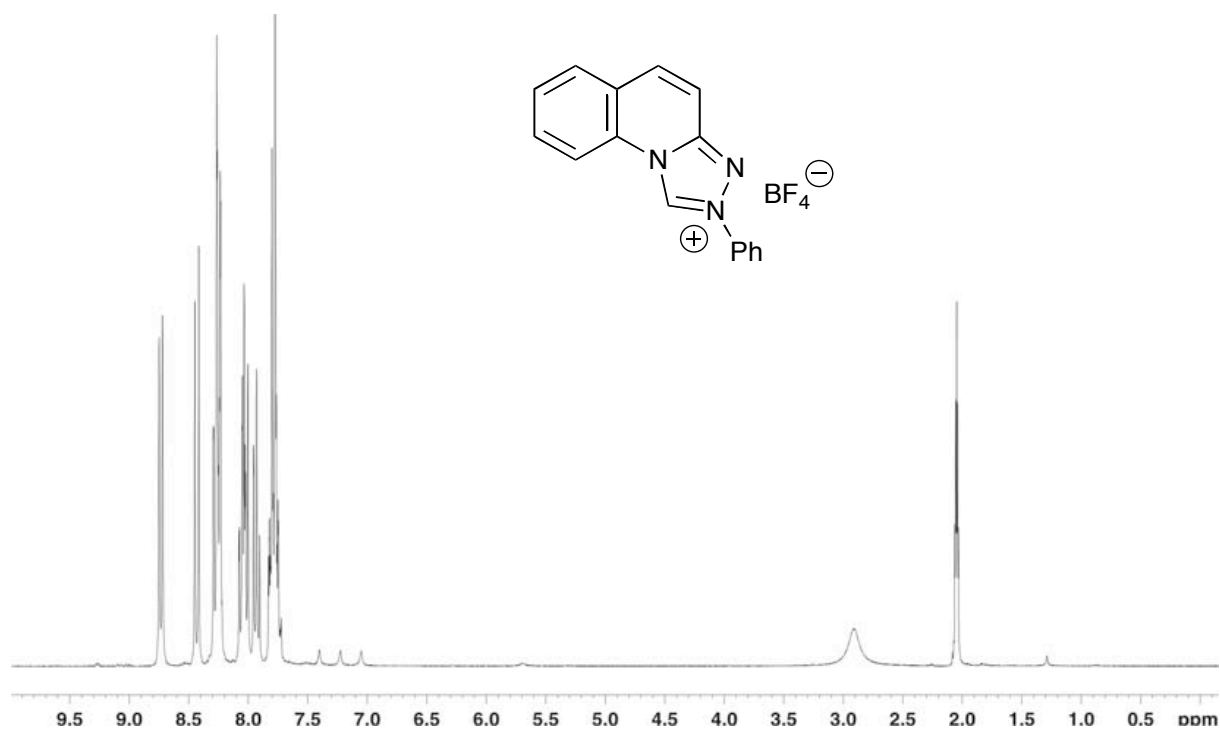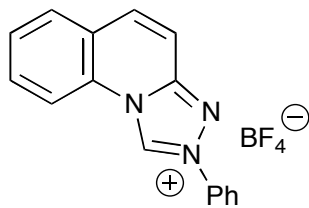

$^{13}\text{C}$  NMR  $[(\text{CD}_3)_2\text{CO}, 75 \text{ MHz}]$  of **7**

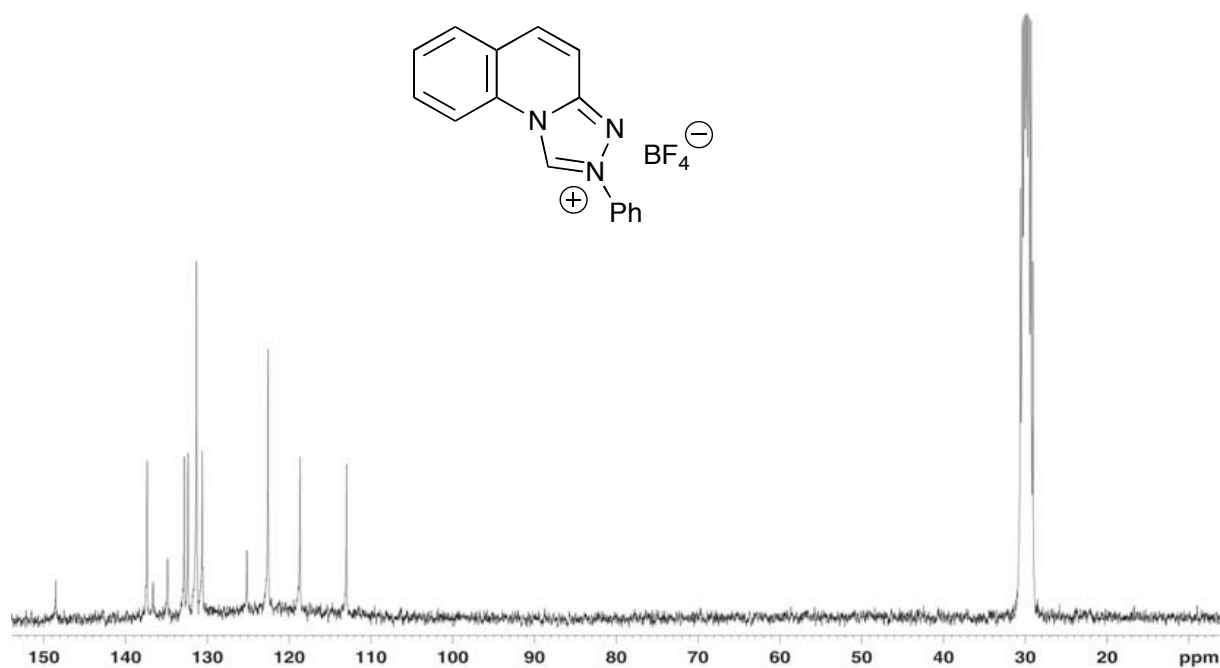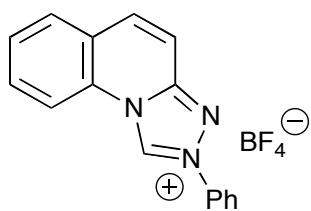

$^1\text{H}$  NMR [ $(\text{CD}_3)_2\text{SO}$ , 300 MHz] of **8**

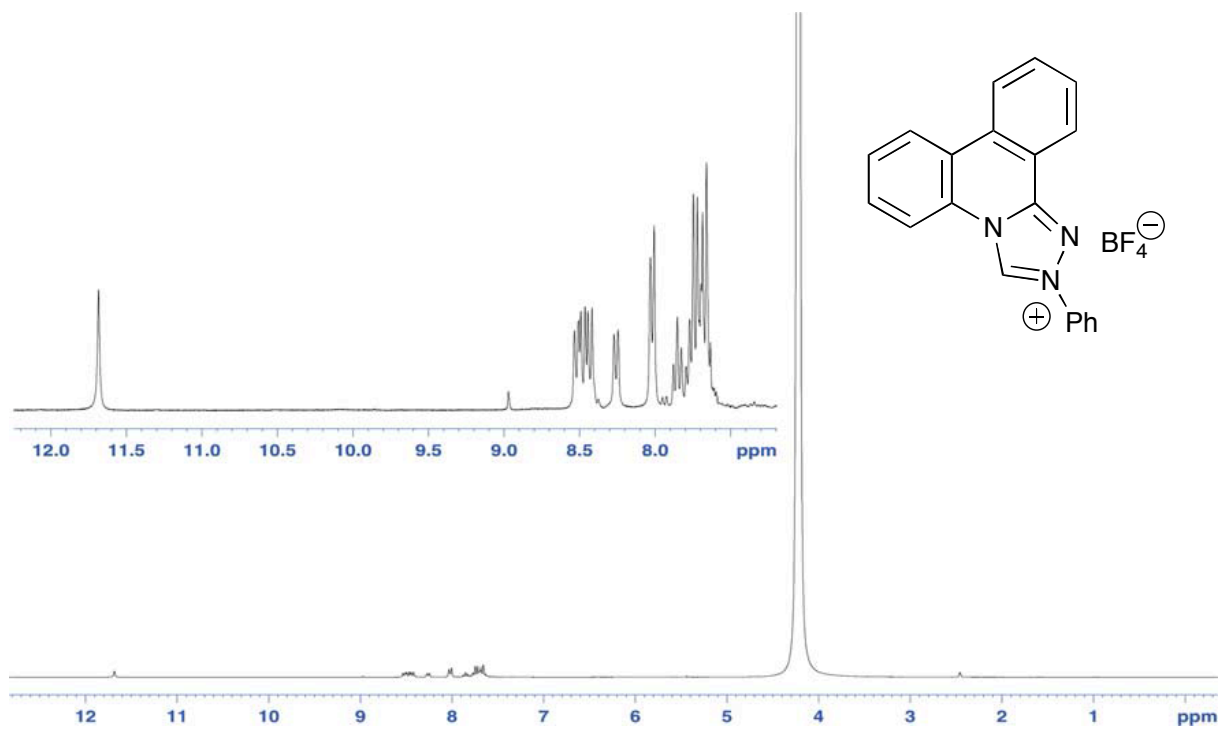

$^{13}\text{C}$  NMR [ $(\text{CD}_3)_2\text{SO}$ , 75 MHz] of **8**

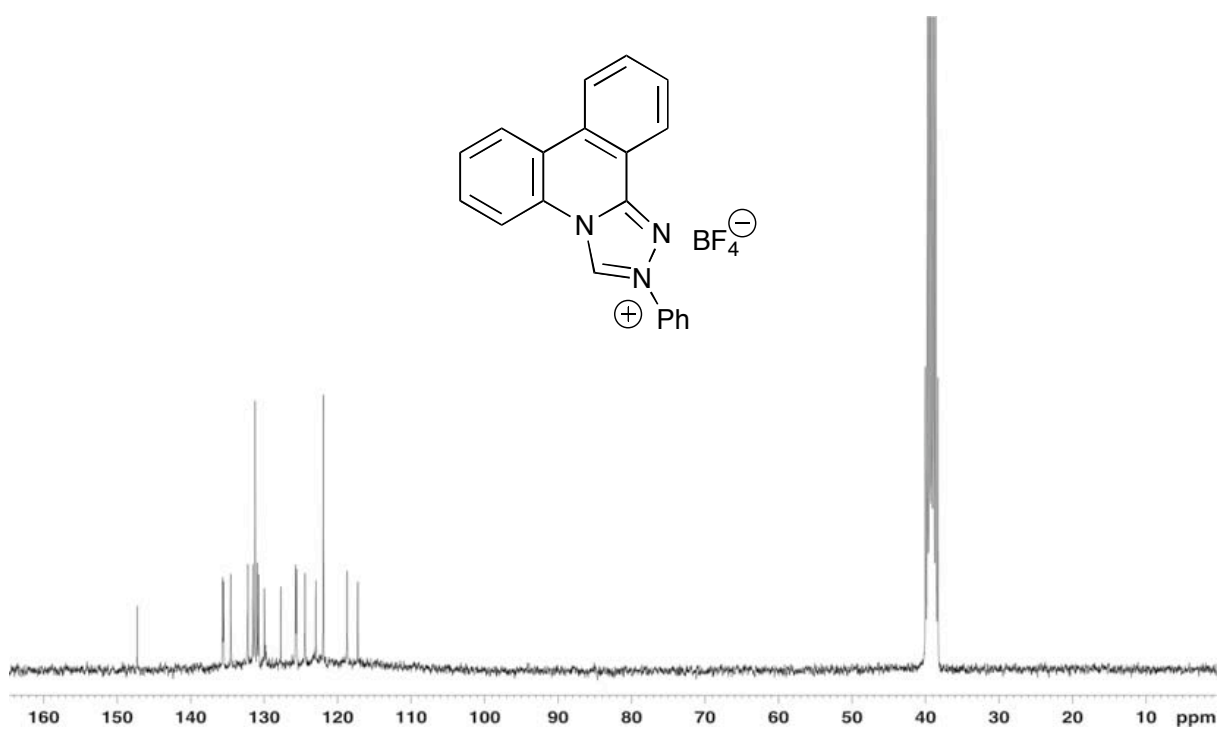

$^1\text{H}$  NMR ( $\text{C}_6\text{D}_6$ , 500 MHz) of **9**

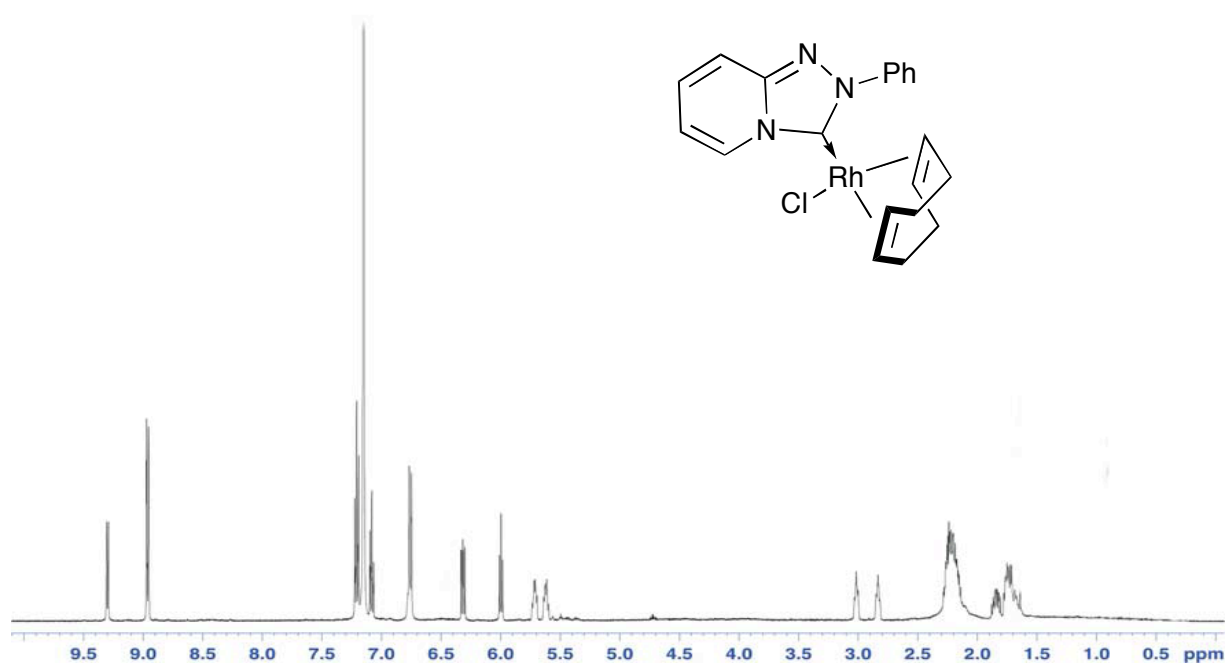

$^{13}\text{C}$  NMR ( $\text{C}_6\text{D}_6$ , 125 MHz) of **9**

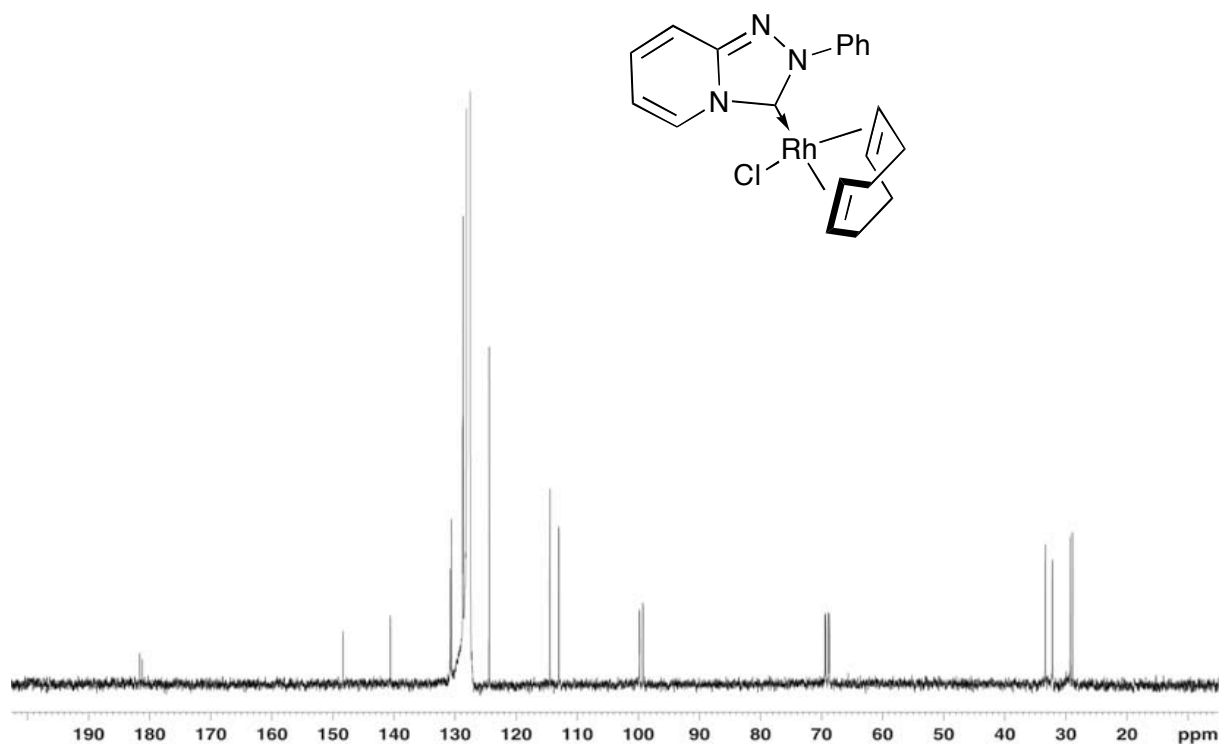

$^1\text{H}$  NMR ( $\text{C}_6\text{D}_6$ , 500 MHz) of **10**

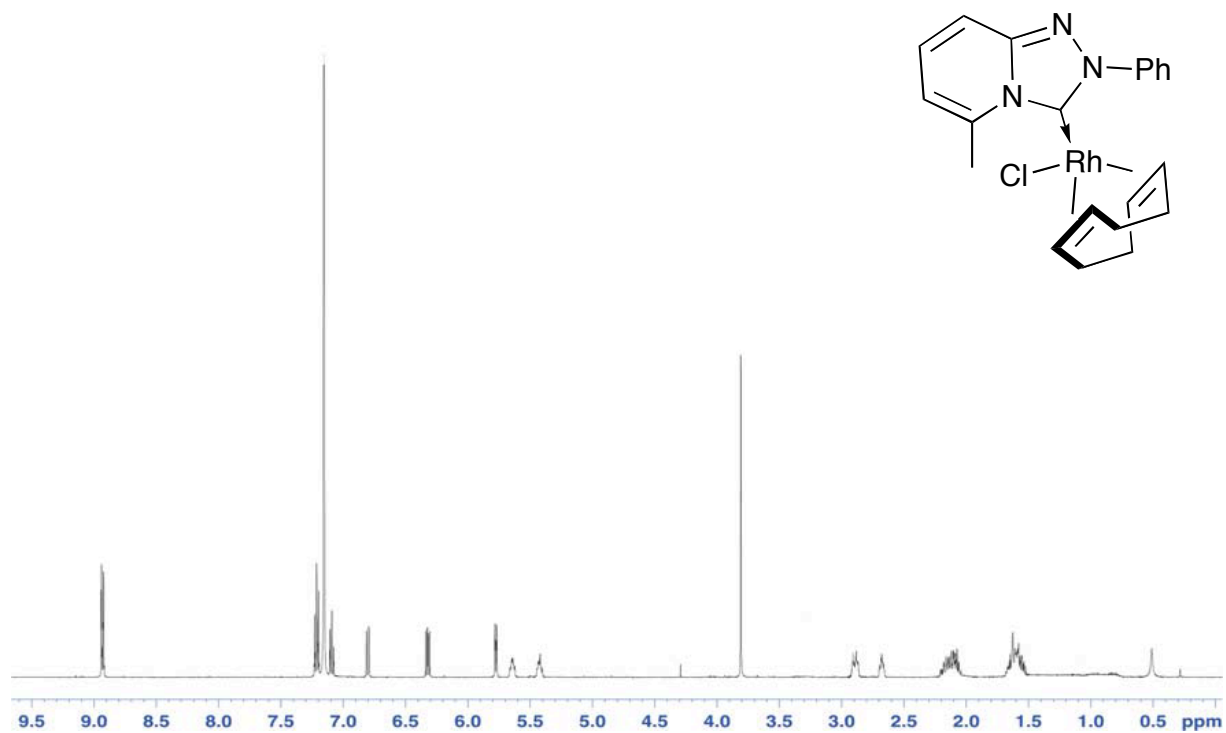

$^{13}\text{C}$  NMR ( $\text{C}_6\text{D}_6$ , 125 MHz) of **10**

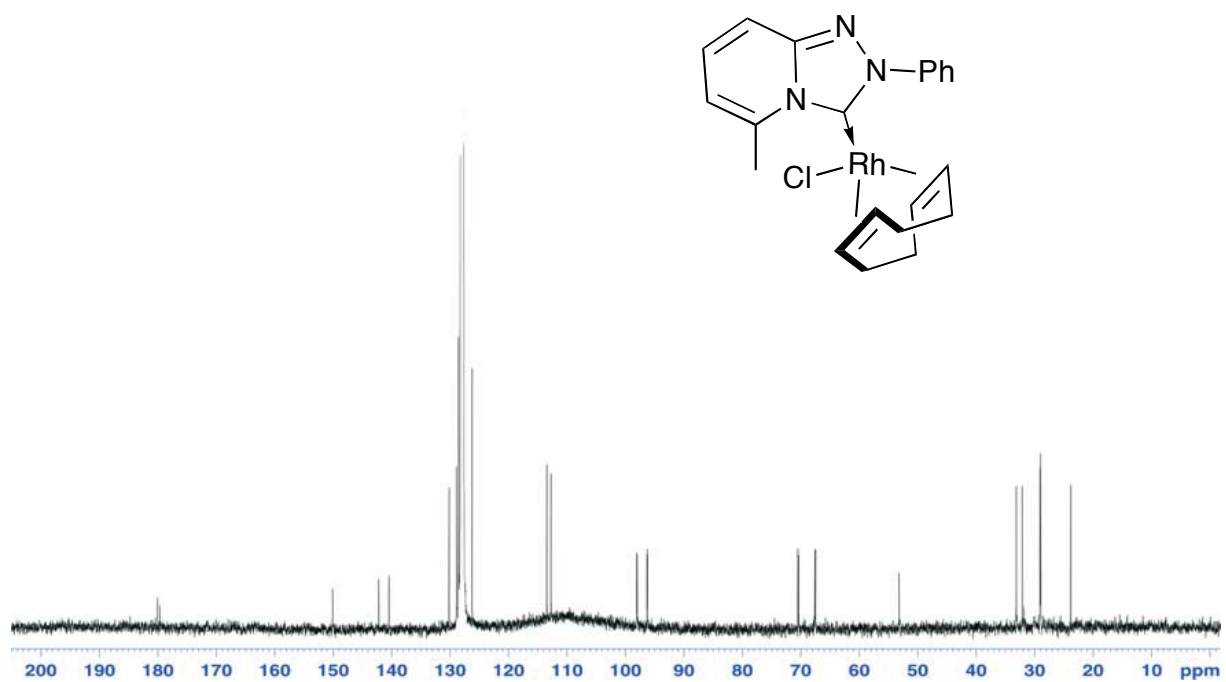

$^1\text{H}$  NMR ( $\text{CDCl}_3$ , 500 MHz) of **11**

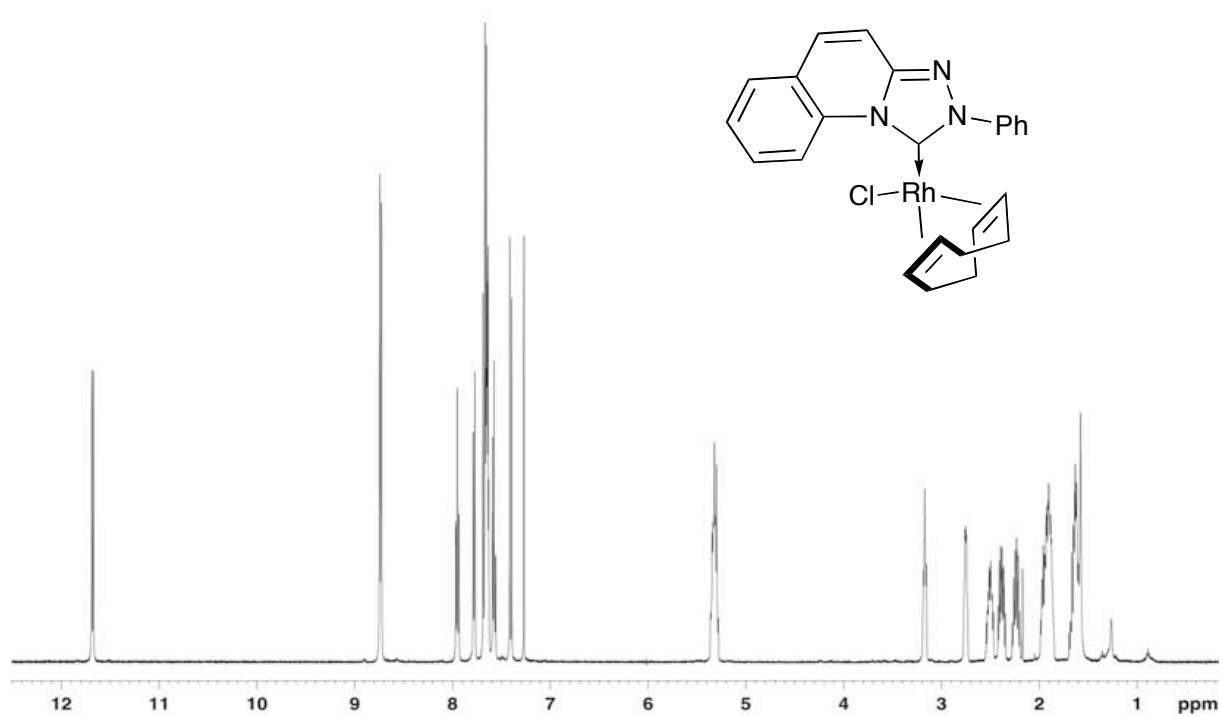

$^{13}\text{C}$  NMR ( $\text{CDCl}_3$ , 125 MHz) of **11**

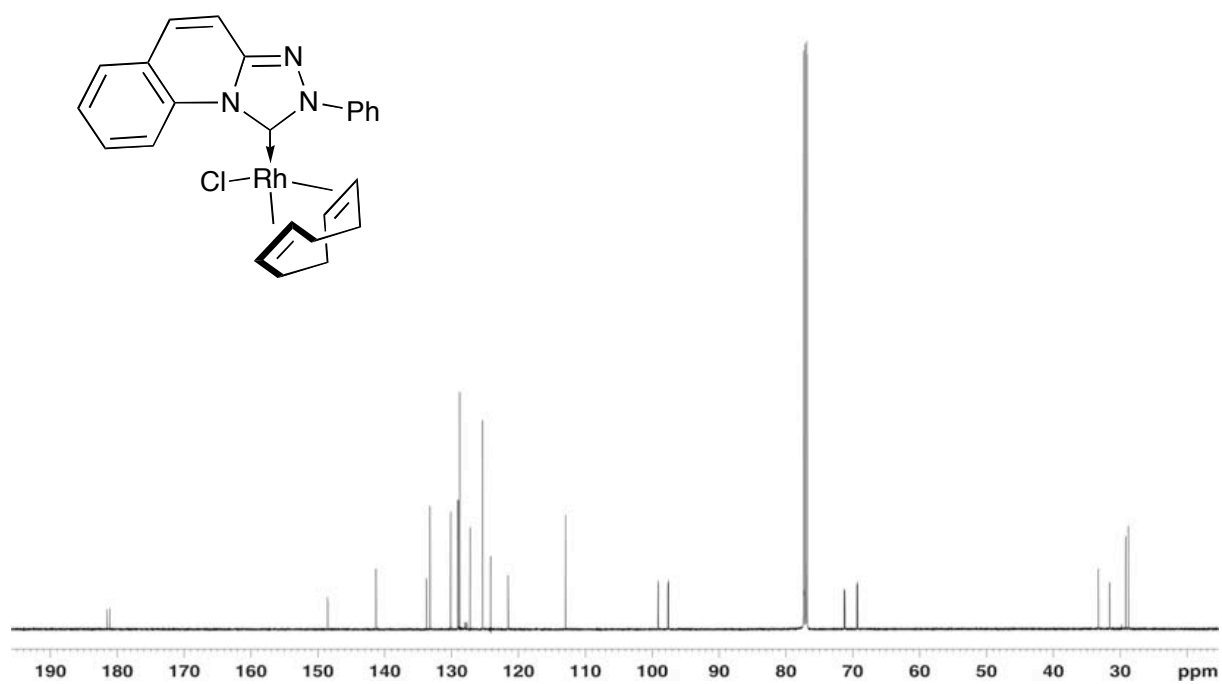



$^1\text{H}$  NMR ( $\text{CDCl}_3$ , 500 MHz) of **12**

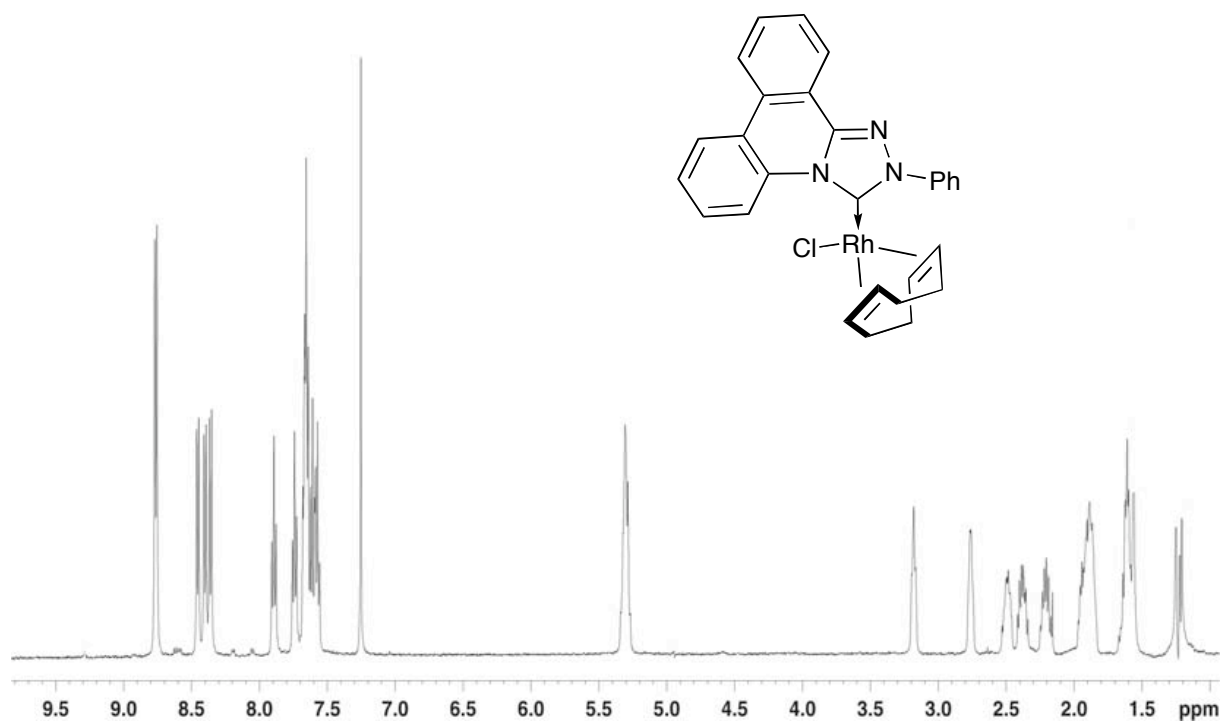

$^{13}\text{C}$  NMR ( $\text{CDCl}_3$ , 125 MHz) of **12**

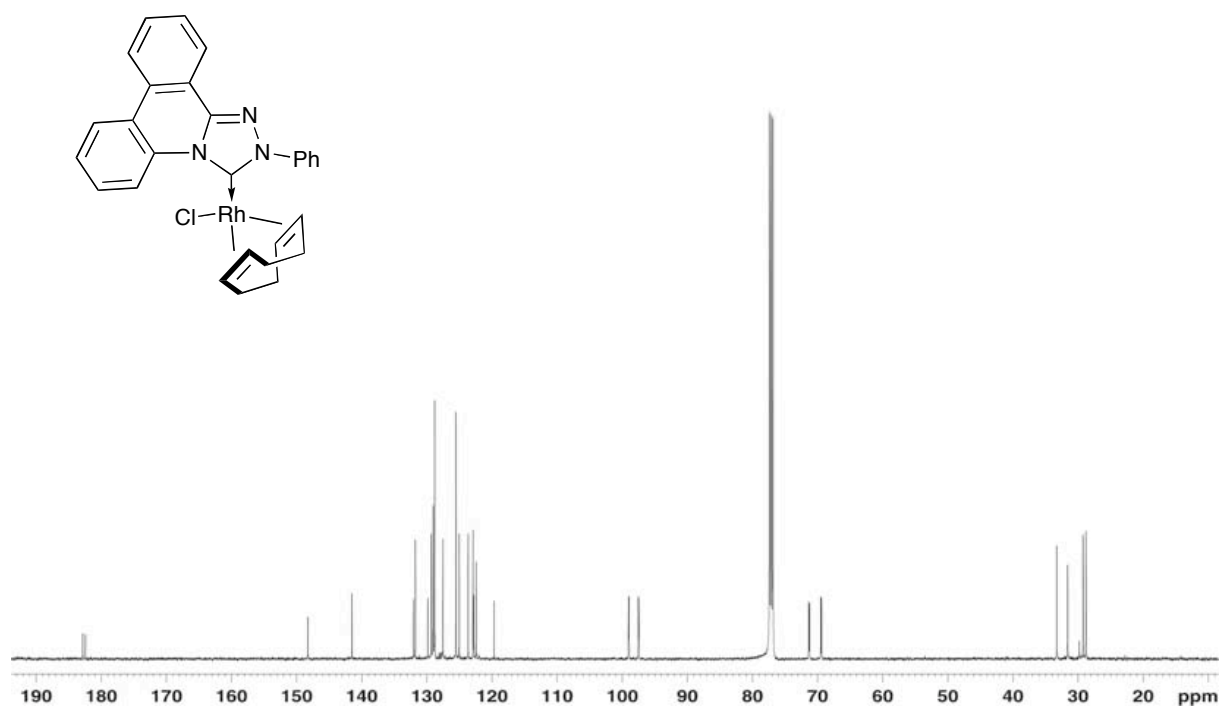

$^1\text{H}$  NMR ( $\text{CDCl}_3$ , 400 MHz) of **13**

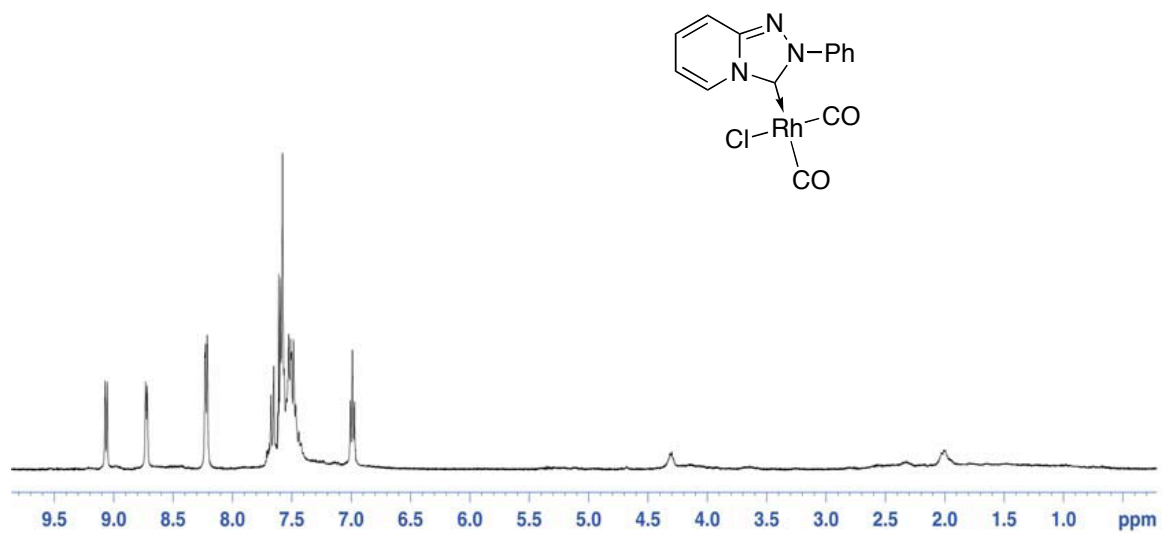

$^{13}\text{C}$  NMR ( $\text{CDCl}_3$ , 100 MHz) of **13**

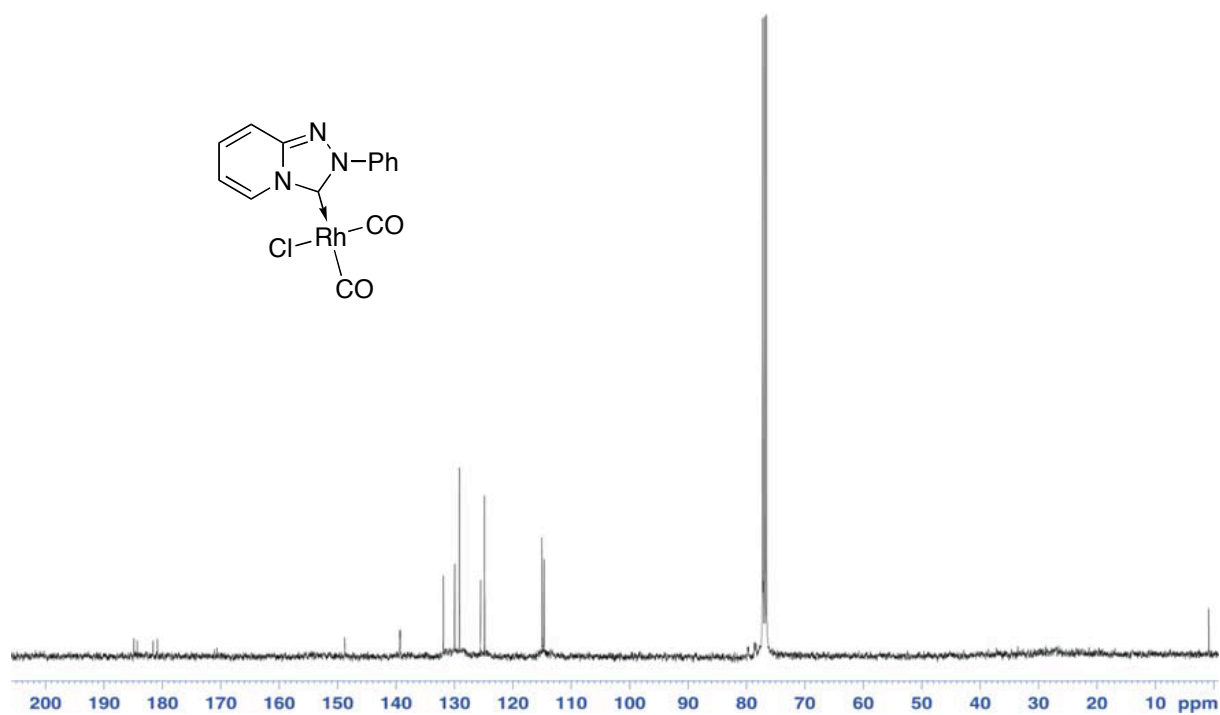

$^1\text{H}$  NMR ( $\text{CDCl}_3$ , 300 MHz) of **14**

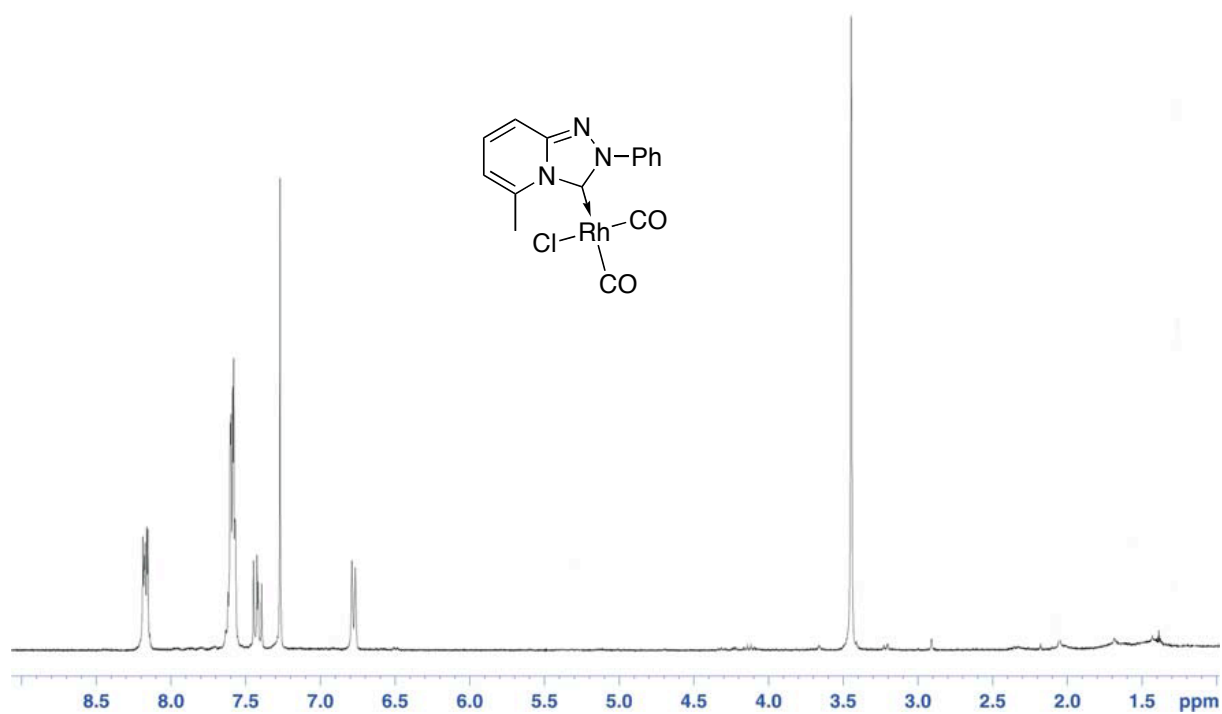

$^{13}\text{C}$  NMR ( $\text{CDCl}_3$ , 75 MHz) of **14**

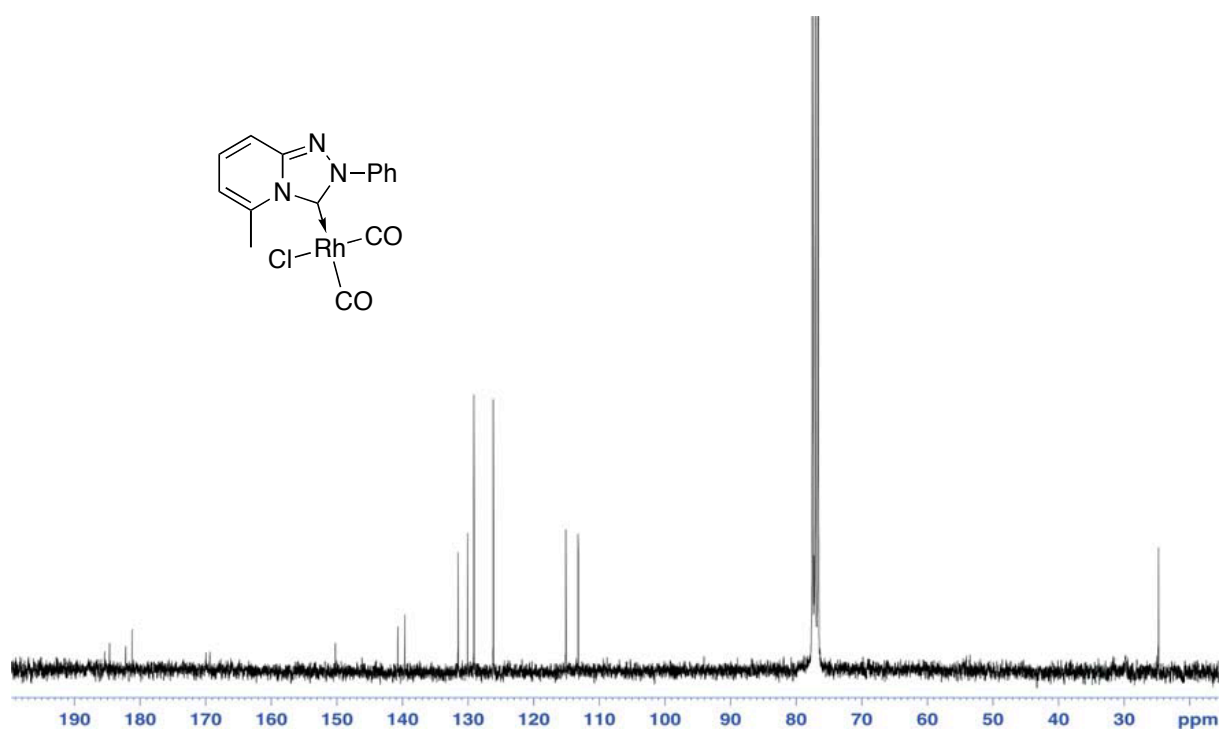

$^1\text{H}$  NMR ( $\text{CDCl}_3$ , 300 MHz) of **15**

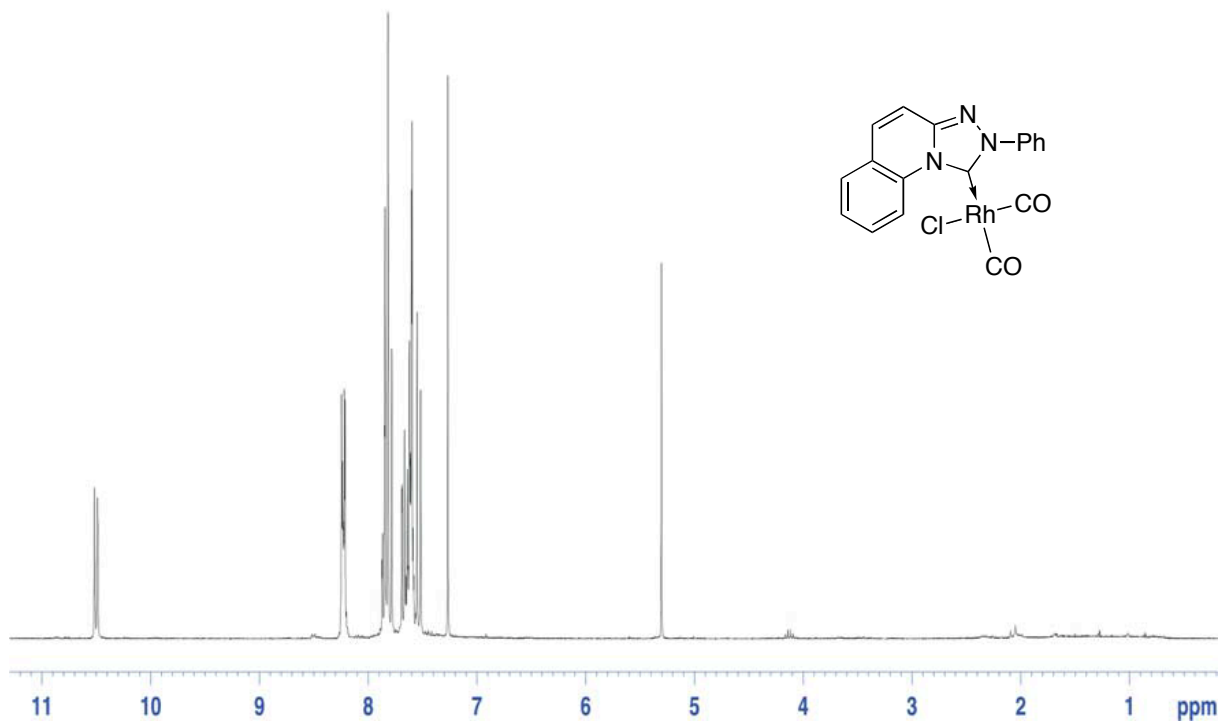

$^{13}\text{C}$  NMR ( $\text{CDCl}_3$ , 75 MHz) of **15**

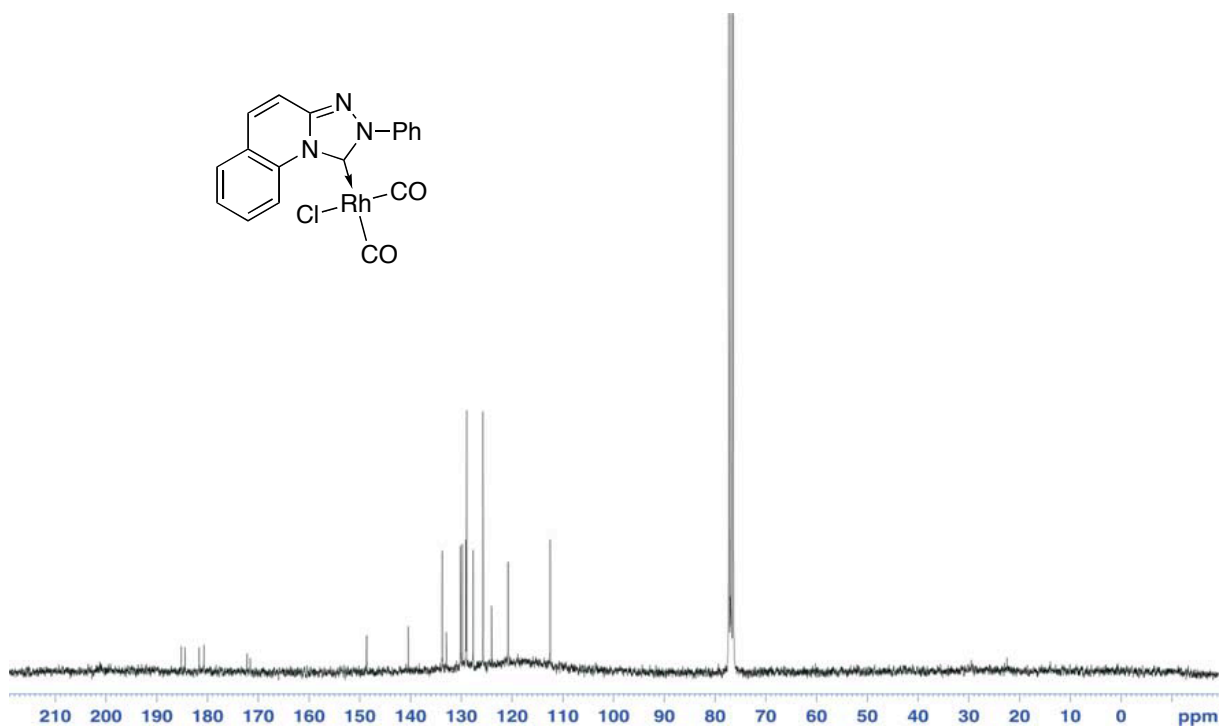

$^1\text{H}$  NMR ( $\text{CDCl}_3$ , 400 MHz) of **16**

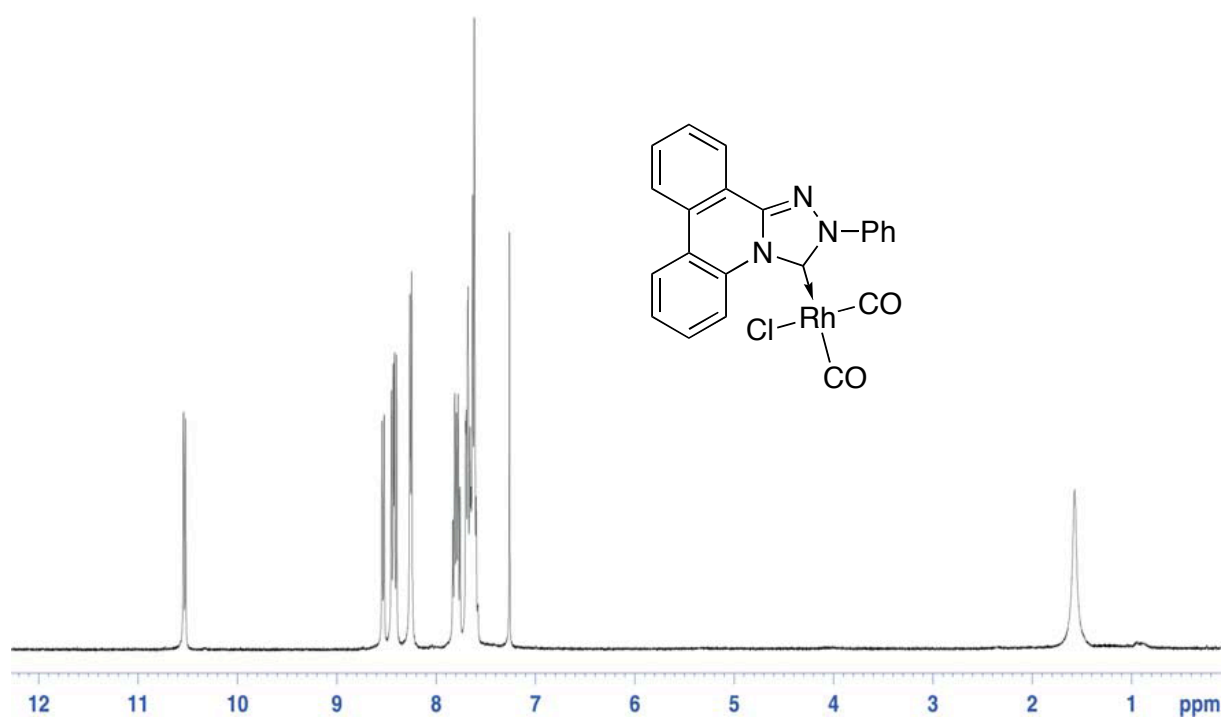

$^{13}\text{C}$  NMR ( $\text{CDCl}_3$ , 100 MHz) of **16**

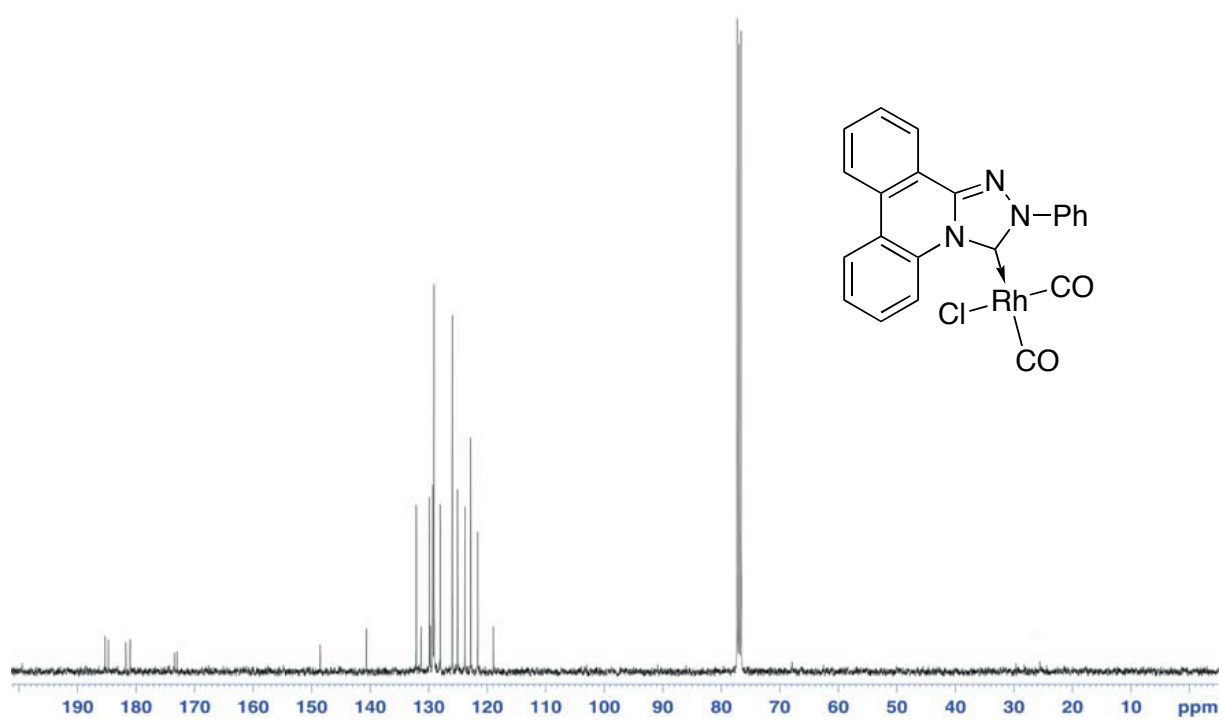

$^1\text{H}$  NMR ( $\text{CDCl}_3$ , 300 MHz) of **17**

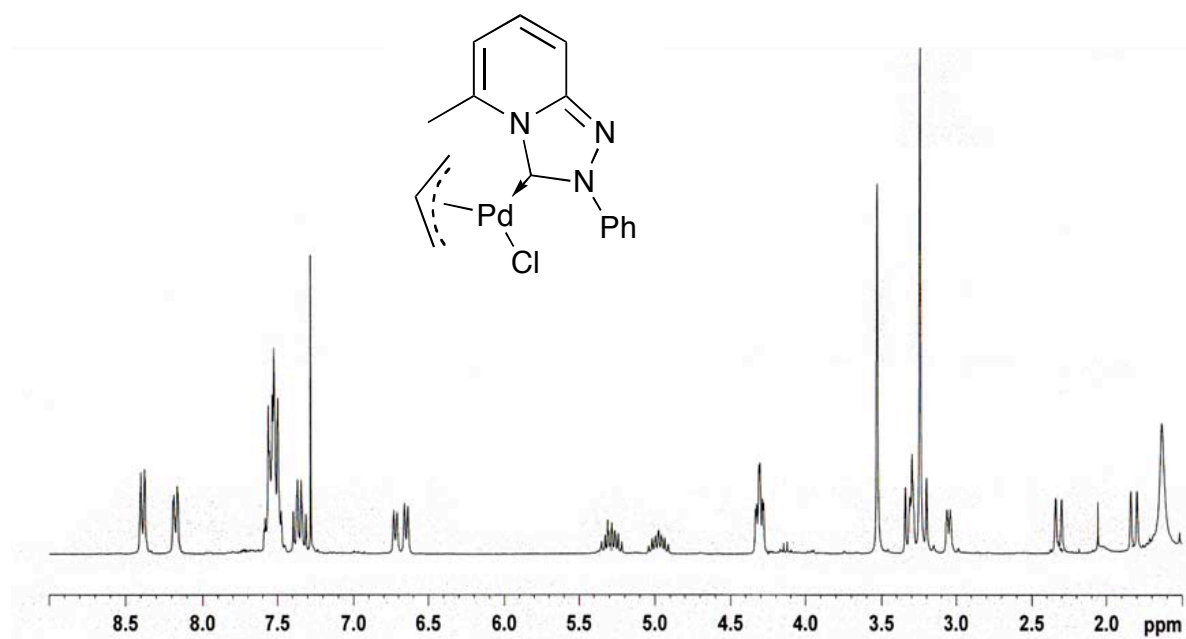

$^{13}\text{C}$  NMR ( $\text{CDCl}_3$ , 75 MHz) of **17**

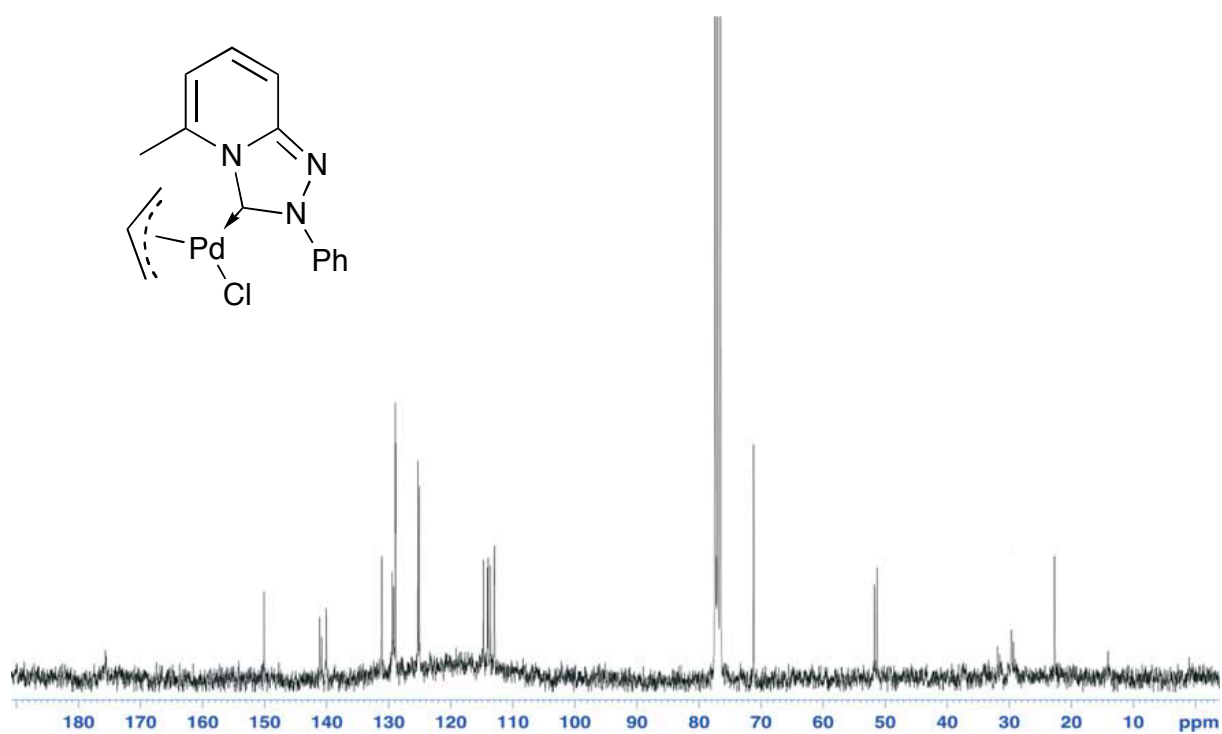

$^1\text{H}$  NMR ( $\text{CDCl}_3$ , 500 MHz) of **18**

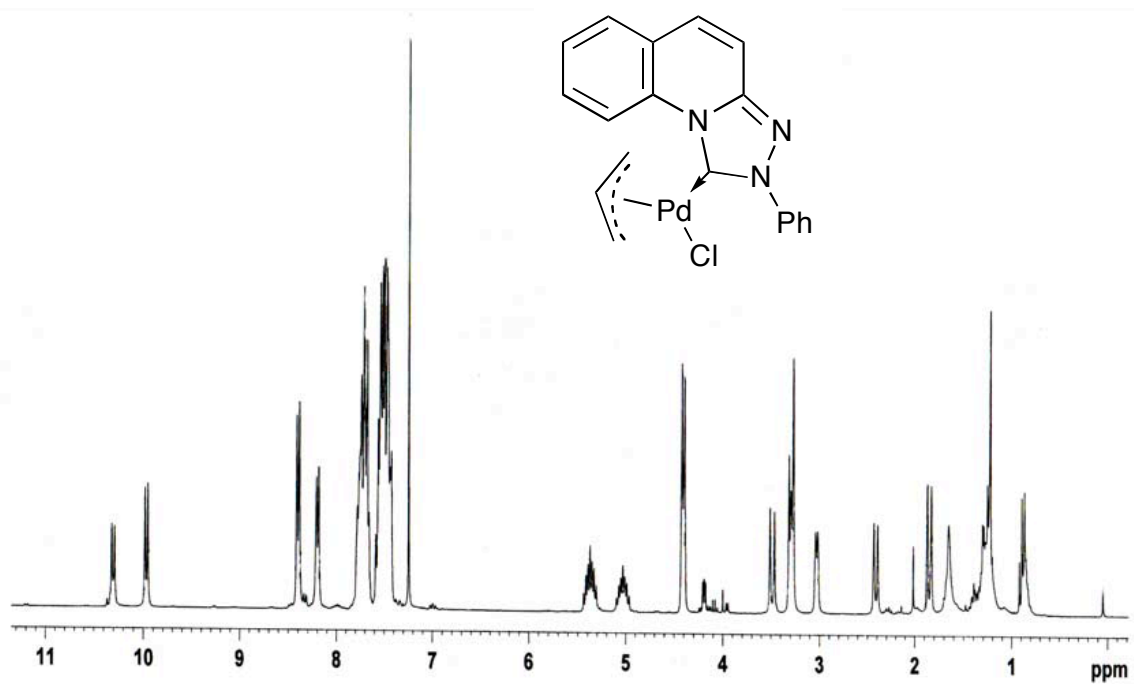

$^{13}\text{C}$  NMR ( $\text{CDCl}_3$ , 125 MHz) of **18**

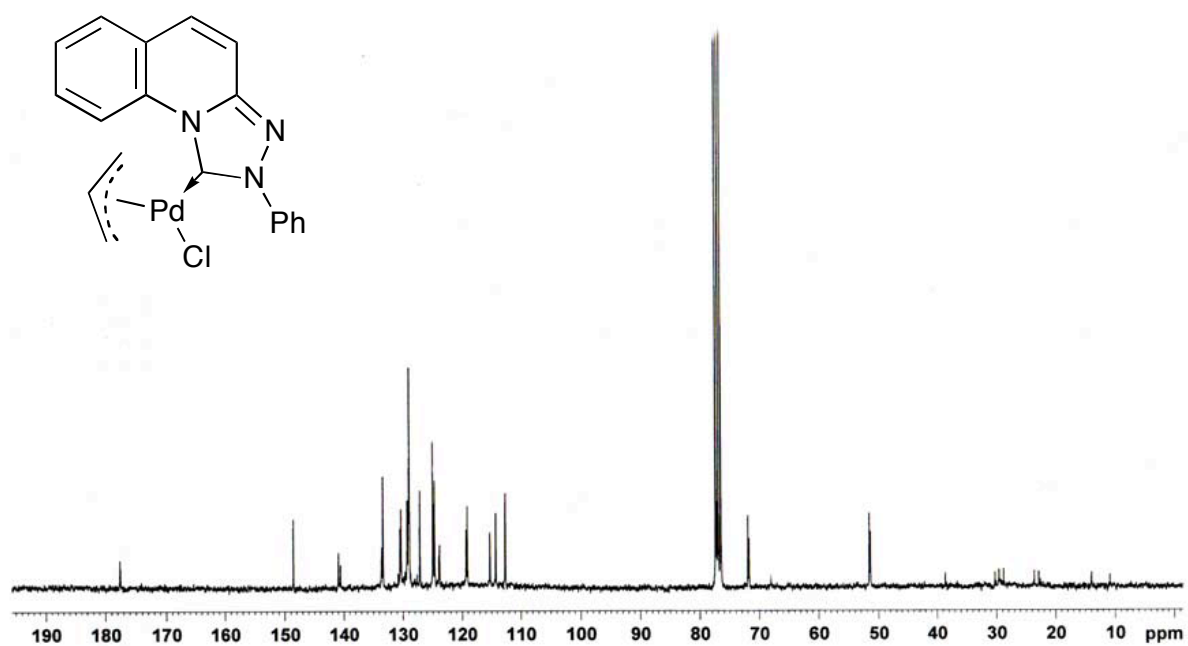

$^1\text{H}$  NMR ( $\text{CDCl}_3$ , 500 MHz) of **19**

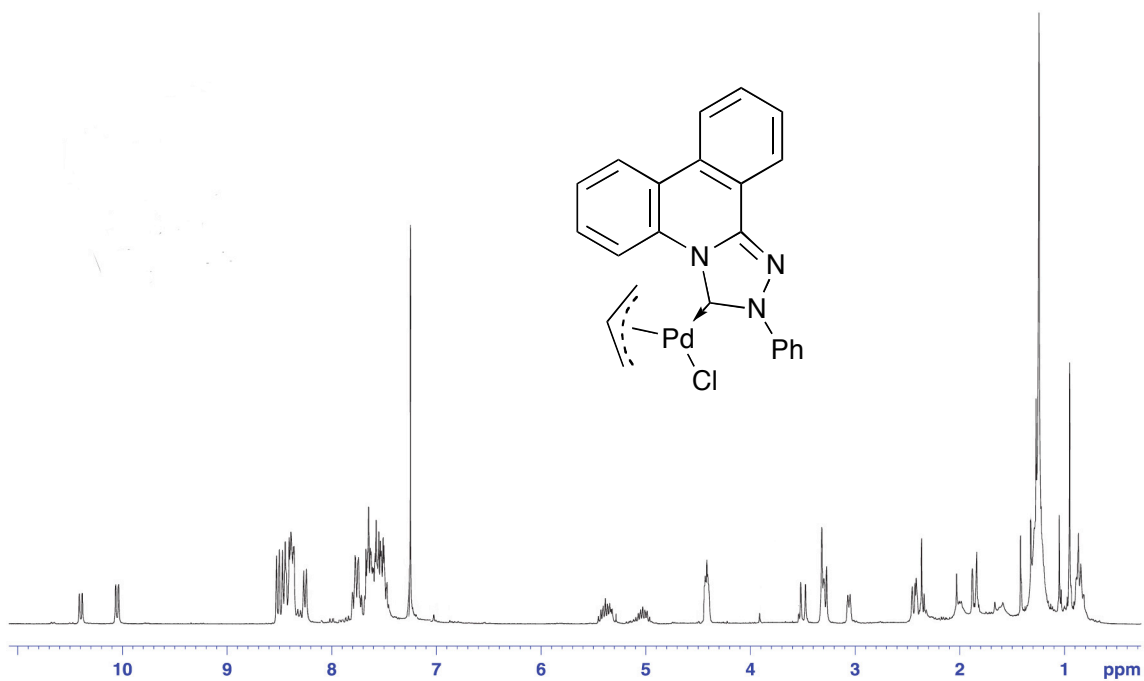

$^{13}\text{C}$  NMR ( $\text{CDCl}_3$ , 125 MHz) of **19**

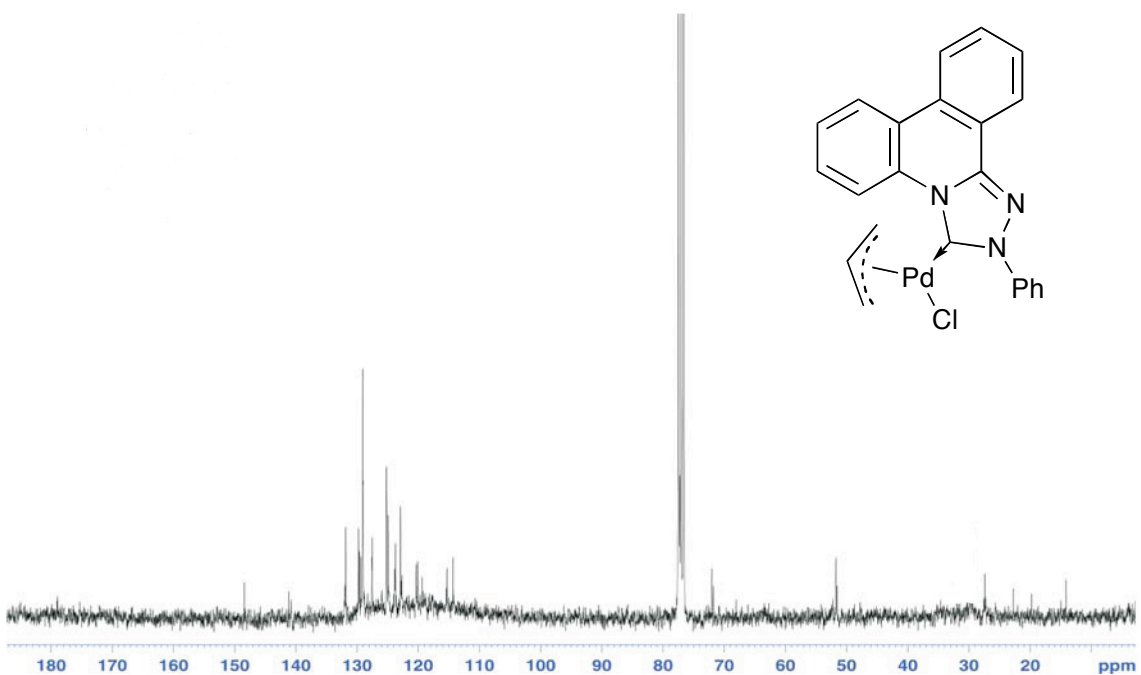

Supplement: b907043e.pdf [file b907043e.pdf]
